# Supplementary material for: Soluble CD74 Reroutes MIF/CXCR4/AKT‐Mediated Survival of Cardiac Myofibroblasts to Necroptosis
Source: PubMed Central journal article supplement — J Am Heart Assoc. 2018 Aug 24;7(17):e009384. doi: 10.1161/JAHA.118.009384 (PMC6201423; doi:10.1161/jaha.118.009384), 2018-08-24
Supplement: JAH3-7-e009384-s001.pdf [file JAH3-7-e009384-s001.pdf]

# **Supplemental Material**

**Table S1. Antibody list used for Western blotting and immunofluorescence staining.**

| <b>Antibody</b>             | <b>Add on</b>     | <b>Use/<br/>Dilution</b> | <b>Blocking/<br/>Dilution<br/>buffer</b> | <b>Source</b> | <b>MW<br/>[kDa]</b> | <b>Manufacturer</b>                                  |
|-----------------------------|-------------------|--------------------------|------------------------------------------|---------------|---------------------|------------------------------------------------------|
| Anti-Actin                  | 1A4               | IF<br>1:200              | PBS-T                                    |               |                     | Santa Cruz                                           |
| Anti- $\alpha$ -<br>Tubulin |                   | WB<br>1:1000             | 1% BSA<br>In TBS-T                       | Mouse         | 50                  | Sigma Aldrich,<br>Munich,<br>Germany                 |
| Anti-AKT                    |                   | WB<br>1:1000             | 5% BSA<br>in TBS-T                       | Rabbit        | 60                  | Cell Signaling<br>Technology<br>Danvers, MA,<br>USA  |
| Anti-<br>Caspase-3          |                   | WB<br>1:1000             | 5% NFDm<br>in TBS-T                      | Rabbit        | 17, 19,<br>35       | Cell Signaling<br>Technology,<br>Beverly, MA,<br>USA |
| Anti-GAPDH                  | D16H11            | WB<br>1:1000             | 5% BSA<br>in TBS-T                       | Rabbit        | 37                  | Cell Signaling<br>Technology<br>Danvers, MA,<br>USA  |
| Anti-p38                    |                   | WB<br>1:1000             | 5% BSA<br>in TBS-T                       | Rabbit        | 43                  | Cell Signaling<br>Technology<br>Danvers, MA,<br>USA  |
| Anti-RIP3                   |                   | WB<br>1:1000             | 5% BSA<br>in TBS-T                       | Rabbit        | 53                  | BioRAD,<br>Munich,<br>Germany                        |
| Anti-TNF<br>alpha           |                   | WB<br>1:700              | 3% NFDm<br>in TBS-T                      | Rabbit        | 25                  | Abcam,<br>Cambridge, UK                              |
| Anti-<br>phospho-AKT        | Ser473            | WB<br>1:1000             | 5% BSA<br>in TBS-T                       | Rabbit        | 60                  | Cell Signaling<br>Technology<br>Danvers, MA,<br>USA  |
| Anti-<br>phospho-p38        | Thr180/<br>Tyr182 | WB<br>1:1000             | 5% BSA<br>in TBS-T                       | Rabbit        | 43                  | Cell Signaling<br>Technology<br>Danvers, MA,<br>USA  |
| Anti-phospho<br>RIP3        | Ser232            | WB<br>1:1000             | 5% NFDm<br>in TBS-T                      | Rabbit        | 53                  | Abcam,<br>Cambridge, UK                              |

|                          |                |                |                    |        |    |                                                     |
|--------------------------|----------------|----------------|--------------------|--------|----|-----------------------------------------------------|
| Anti-Vimentin            |                | IF<br>1:200    | 2% BSA<br>in PBS-T | Rabbit | 57 | Thermo Fisher<br>Scientific,<br>Waltham, MA,<br>USA |
| Anti-Mouse               | HRP            | WB<br>1:5,000  | 1% BSA<br>in TBS-T | Donkey |    | Abcam,<br>Cambridge, UK                             |
| Anti-Rabbit              | HRP            | WB<br>1:10,000 | 1% BSA<br>in TBS-T | Donkey |    | GE Healthcare,<br>Munich,<br>Germany                |
| Anti-Mouse<br>IgG        | DyLight<br>550 | IF<br>1:200    | PBS-T              | Goat   |    | Thermo Fisher<br>Scientific,<br>Waltham, MA,<br>USA |
| Anti-Rabbit<br>IgG (H+L) | DyLight<br>288 | IF<br>1:200    | PBS-T              |        |    | Thermo Fisher<br>Scientific,<br>Waltham, MA,<br>USA |

---

BSA, bovine serum albumin; HRP, horse radish peroxidase; IF, Immunofluorescence; MW, molecular weight NFDM, non-fat dry milk; PBS-T , phosphate-buffered saline with Tween20; TBS-T, Tris-buffered saline with 0.1% Tween20; WB, Western blot

**Table S2. Gene expression analysis using TaqMan assays from Applied Biosystems.**

| <b>Gene/TaqMan probe</b> | <b>Assay ID</b> |
|--------------------------|-----------------|
| Acta2                    | Mm00725412_s1   |
| FN1                      | Mm01256744_m1   |
| Ccl2                     | Mm00441242_m1   |
| Ccl7                     | Mm00443113_m1   |
| Clec4e                   | Mm01183703_m1   |
| Col1a1                   | Mm00801666_g1   |
| GAPDH                    | Mm99999915_g1   |
| Ifi44                    | Mm00505670_m1   |
| Irg1                     | Mm01224532_m1   |
| Oasl2                    | Mm01201449_m1   |
| Tgtp2                    | Mm00786926_s1   |
| TNF $\alpha$             | Mm00443258_m1   |

Acta2; actin, alpha 2, smooth muscle, aorta (alias:  $\alpha$ -SMA); FN1, fibronectin 1; Ccl, C-C motif chemokine ligand; Clec4e, C-type lectin domain family 4 member e; Col1a1, collagen, type I, alpha 1; GAPDH, glyceraldehyde-3-phosphate dehydrogenase; Ifi44, interferon-induced protein 44; Irg1, immunoresponsive gene 1; Oasl2, 2'-5' oligoadenylate synthetase-like 2; Tgtp2, T cell specific GTPase 2; TNF $\alpha$ , tumor necrosis factor  $\alpha$ .

**Table S3. Antibody list used for flow cytometry analysis.**

| <b>Antibody</b>  | <b>Labeling</b> | <b>Host</b> | <b>Volume</b> | <b>Manufacturer</b>                |
|------------------|-----------------|-------------|---------------|------------------------------------|
| Anti-mouse-CD74  | FITC            | Rat         | 3 $\mu$ l     | BD Bioscience, Heidelberg, Germany |
| Anti-mouse-CXCR2 | PE              | Rat         | 3 $\mu$ l     | R&D, Minneapolis, MN, USA          |
| Anti-mouse-CXCR4 | FITC            | Rat         | 3 $\mu$ l     | R&D, Minneapolis, MN, USA          |
| Anti-mouse-TLR2  | FITC            | Rat         | 3 $\mu$ l     | R&D, Minneapolis, MN, USA          |
| Anti-mouse-TLR4  | PE              | Rat         | 3 $\mu$ l     | R&D, Minneapolis, MN, USA          |
| Anti-mouse-TNFR1 | FITC            | Hamster     | 1 $\mu$ l     | Abcam, Cambridge, UK               |
| Anti-hamster IgG | FITC            | Hamster     | 0.2 $\mu$ l   | Abcam, Cambridge, UK               |
| Anti-rat-IgG2B   | FITC            | Rat         | 3 $\mu$ l     | BD Bioscience, Heidelberg, Germany |
| Anti-rat IgG2A   | PE              | Rat         | 3 $\mu$ l     | R&D, Minneapolis, MN, USA          |
| Anti-rat Ig2B    | FITC            | Rat         | 3 $\mu$ l     | R&D, Minneapolis, MN, USA          |

FITC, Fluorescein isothiocyanate; PE, Phycoerythrin

**Table S4. Effect Size.**

|                                           |                                           | <b>Comparison</b>                                   | <b>d (Effect Size)</b> |
|-------------------------------------------|-------------------------------------------|-----------------------------------------------------|------------------------|
| Figure 1B                                 | $\alpha$ -SMA                             | Day0 vs. Day5                                       | 16.65                  |
|                                           | Col1a1                                    | Day0 vs. Day5                                       | 7.44                   |
|                                           | Fibronectin 1                             | Day0 vs. Day5                                       | 1.61                   |
| Figure 1C                                 | Ctrl vs. sCD74 treatment alone            | Ctrl vs. 0.04 nmol/L sCD74                          | 0.21                   |
|                                           |                                           | Ctrl vs. 0.16 nmol/L sCD74                          | 0.51                   |
|                                           |                                           | Ctrl vs. 8 nmol/L sCD74                             | 1.02                   |
|                                           |                                           | Ctrl vs. 16 nmol/L sCD74                            | 1.05                   |
|                                           |                                           | Ctrl vs. 40 nmol/L sCD74                            | 1.05                   |
|                                           | MIF vs. sCD74/MIF Cotreatment             | MIF vs. 0.04 nmol/L sCD74 + MIF                     | 0.92                   |
|                                           |                                           | MIF vs. 0.16 nmol/L sCD74 + MIF                     | 1.11                   |
|                                           |                                           | MIF vs. 8 nmol/L sCD74 + MIF                        | 2.33                   |
|                                           |                                           | MIF vs. 16 nmol/L sCD74 + MIF                       | 3.30                   |
|                                           |                                           | MIF vs. 40 nmol/L sCD74 + MIF                       | 3.27                   |
|                                           | sCD74 treatment vs. sCD74/MIF cotreatment | 0nmol/L sCD74 (Control) vs. 0.04 nmol/L sCD74 + MIF | 0.11                   |
|                                           |                                           | 0.04 nmol/L sCD74 vs. 0.04 nmol/L sCD74 + MIF       | 0.91                   |
|                                           |                                           | 0.16 nmol/L sCD74 vs. 0.16 nmol/L sCD74 + MIF       | 1.52                   |
|                                           |                                           | 8 nmol/L sCD74 vs. 8 nmol/L sCD74 + MIF             | 1.16                   |
|                                           |                                           | 16 nmol/L sCD74 vs. 16 nmol/L sCD74 + MIF           | 3.27                   |
| 40 nmol/L sCD74 vs. 40 nmol/L sCD74 + MIF |                                           | 1.86                                                |                        |
| Figure 1D                                 | Effects within CMs                        | Ctrl vs. MIF                                        | 0.18                   |
|                                           |                                           | Ctrl vs. sCD74                                      | 0.44                   |
|                                           |                                           | Ctrl vs. sCD74/MIF                                  | 0.81                   |
|                                           |                                           | MIF vs. sCD74/MIF                                   | 0.66                   |
|                                           |                                           | sCD74 vs. sCD74/MIF                                 | 0.04                   |
|                                           | Effects in CMs vs. MyoFBs                 | Control                                             | 0.00                   |
|                                           |                                           | MIF                                                 | 0.05                   |
|                                           |                                           | sCD74                                               | 0.55                   |
|                                           |                                           | sCD74/MIF                                           | 3.14                   |
| Figure 2A                                 | Cleaved Caspase 3 level at 10h            | Ctrl vs. MIF                                        | 0.63                   |
|                                           |                                           | Ctrl vs. sCD74                                      | 3.05                   |
|                                           |                                           | Ctrl vs. sCD74/MIF                                  | 0.53                   |
|                                           |                                           | MIF vs. sCD74/MIF                                   | 0.07                   |
|                                           |                                           | sCD74 vs. sCD74/MIF                                 | 0.21                   |
| Figure 2C                                 | Phosphorylated RIP3 level at 10h          | Ctrl vs. MIF                                        | 2.34                   |
|                                           |                                           | Ctrl vs. sCD74                                      | 0.51                   |
|                                           |                                           | Ctrl vs. sCD74/MIF                                  | 1.88                   |
|                                           |                                           | MIF vs. sCD74/MIF                                   | 1.52                   |
|                                           |                                           | sCD74 vs. sCD74/MIF                                 | 1.73                   |
| Figure 2E                                 |                                           | Ctrl vs. MIF                                        | 0.29                   |

|           |                                  |                                 |                     |      |
|-----------|----------------------------------|---------------------------------|---------------------|------|
|           | Effects within the DMSO group    | Ctrl vs. sCD74                  | 0.42                |      |
|           |                                  | Ctrl vs. sCD74/MIF              | 3.50                |      |
|           |                                  | MIF vs. sCD74/MIF               | 2.72                |      |
|           |                                  | sCD74 vs. sCD74/MIF             | 3.83                |      |
|           |                                  | Effects within the Nec1s group  | Ctrl vs. MIF        | 1.81 |
|           |                                  |                                 | Ctrl vs. sCD74      | 1.38 |
|           |                                  |                                 | Ctrl vs. sCD74/MIF  | 3.39 |
|           |                                  |                                 | MIF vs. sCD74/MIF   | 0.59 |
|           |                                  |                                 | sCD74 vs. sCD74/MIF | 1.56 |
|           |                                  | Effects in DMSO vs. Nec1s group | Control             | 0.02 |
|           |                                  |                                 | MIF                 | 0.94 |
|           |                                  |                                 | sCD74               | 0.72 |
|           |                                  |                                 | sCD74/MIF           | 2.29 |
| Figure 3B | Ifi44 mRNA                       | Ctrl vs. MIF                    | 1.20                |      |
|           |                                  | Ctrl vs. sCD74                  | 2.01                |      |
|           |                                  | Ctrl vs. sCD74/MIF              | 2.50                |      |
|           |                                  | MIF vs. sCD74/MIF               | 2.11                |      |
|           |                                  | sCD74 vs. sCD74/MIF             | 1.01                |      |
| Figure 3C | Irg1 mRNA                        | Ctrl vs. MIF                    | 1.26                |      |
|           |                                  | Ctrl vs. sCD74                  | 1.36                |      |
|           |                                  | Ctrl vs. sCD74/MIF              | 2.11                |      |
|           |                                  | MIF vs. sCD74/MIF               | 0.69                |      |
|           |                                  | sCD74 vs. sCD74/MIF             | 1.10                |      |
| Figure 3D | Clec4e mRNA                      | Ctrl vs. MIF                    | 0.96                |      |
|           |                                  | Ctrl vs. sCD74                  | 0.99                |      |
|           |                                  | Ctrl vs. sCD74/MIF              | 2.36                |      |
|           |                                  | MIF vs. sCD74/MIF               | 0.86                |      |
|           |                                  | sCD74 vs. sCD74/MIF             | 1.59                |      |
| Figure 4A | Phosphorylated AKT level at 0.5h | Ctrl vs. MIF                    | 8.31                |      |
|           |                                  | Ctrl vs. sCD74                  | 2.21                |      |
|           |                                  | Ctrl vs. sCD74/MIF              | 0.58                |      |
|           |                                  | MIF vs. sCD74/MIF               | 2.23                |      |
|           |                                  | sCD74 vs. sCD74/MIF             | 0.45                |      |
| Figure 4B | Phosphorylated AKT level at 10h  | Ctrl vs. MIF                    | 1.18                |      |
|           |                                  | Ctrl vs. sCD74                  | 0.95                |      |
|           |                                  | Ctrl vs. sCD74/MIF              | 0.64                |      |
|           |                                  | MIF vs. sCD74/MIF               | 1.32                |      |
|           |                                  | sCD74 vs. sCD74/MIF             | 1.02                |      |
| Figure 4E | Phosphorylated p38 level at 0.5h | Ctrl vs. MIF                    | 0.14                |      |
|           |                                  | Ctrl vs. sCD74                  | 0.20                |      |
|           |                                  | Ctrl vs. sCD74/MIF              | 0.09                |      |
|           |                                  | MIF vs. sCD74/MIF               | 0.16                |      |
|           |                                  | sCD74 vs. sCD74/MIF             | 0.03                |      |
| Figure 4F | Phosphorylated p38 level at 10h  | Ctrl vs. MIF                    | 2.34                |      |
|           |                                  | Ctrl vs. sCD74                  | 0.51                |      |
|           |                                  | Ctrl vs. sCD74/MIF              | 1.88                |      |
|           |                                  | MIF vs. sCD74/MIF               | 1.52                |      |

|           |                                                             |                     |      |
|-----------|-------------------------------------------------------------|---------------------|------|
|           |                                                             | sCD74 vs. sCD74/MIF | 1.73 |
| Figure 5A | Effect of sCD74/MIF on Cd74 <sup>-/-</sup>                  | Ctrl vs. MIF        | 0.43 |
|           |                                                             | Ctrl vs. sCD74      | 0.12 |
|           |                                                             | Ctrl vs. sCD74/MIF  | 0.94 |
|           |                                                             | MIF vs. sCD74/MIF   | 0.66 |
|           |                                                             | sCD74 vs. sCD74/MIF | 1.02 |
| Figure 5B | Effect of sCD74/MIF on WT                                   | Ctrl vs. MIF        | 0.11 |
|           |                                                             | Ctrl vs. sCD74      | 1.05 |
|           |                                                             | Ctrl vs. sCD74/MIF  | 3.91 |
|           |                                                             | MIF vs. sCD74/MIF   | 3.27 |
|           |                                                             | sCD74 vs. sCD74/MIF | 1.86 |
| Figure 5C | Effect of sCD74/MIF in Cd74 <sup>-/-</sup> vs. WT           | Control             | 0.00 |
|           |                                                             | MIF                 | 0.41 |
|           |                                                             | sCD74               | 0.94 |
|           |                                                             | sCD74/MIF           | 1.56 |
| Figure 5D | Effect of sCD74/MIF on SB225002-pretreated WT               | Ctrl vs. MIF        | 0.24 |
|           |                                                             | Ctrl vs. sCD74      | 1.11 |
|           |                                                             | Ctrl vs. sCD74/MIF  | 2.71 |
|           |                                                             | MIF vs. sCD74/MIF   | 2.05 |
|           |                                                             | sCD74 vs. sCD74/MIF | 1.77 |
| Figure 5E | Effect of sCD74/MIF on DMSO-pretreated WT                   | Ctrl vs. MIF        | 0.23 |
|           |                                                             | Ctrl vs. sCD74      | 0.58 |
|           |                                                             | Ctrl vs. sCD74/MIF  | 3.42 |
|           |                                                             | MIF vs. sCD74/MIF   | 5.59 |
|           |                                                             | sCD74 vs. sCD74/MIF | 2.83 |
| Figure 5F | Effect of sCD74/MIF in WT+SB225002 vs. WT+DMSO              | Control             | 0.36 |
|           |                                                             | MIF                 | 0.12 |
|           |                                                             | sCD74               | 0.58 |
|           |                                                             | sCD74/MIF           | 1.10 |
| Figure 5G | Effect of sCD74/MIF on AMD3100-pretreated WT                | Ctrl vs. MIF        | 1.95 |
|           |                                                             | Ctrl vs. sCD74      | 0.88 |
|           |                                                             | Ctrl vs. sCD74/MIF  | 4.06 |
|           |                                                             | MIF vs. sCD74/MIF   | 0.86 |
|           |                                                             | sCD74 vs. sCD74/MIF | 2.09 |
| Figure 5H | Effect of sCD74/MIF on ddH <sub>2</sub> O-pretreated WT     | Ctrl vs. MIF        | 0.30 |
|           |                                                             | Ctrl vs. sCD74      | 0.32 |
|           |                                                             | Ctrl vs. sCD74/MIF  | 4.33 |
|           |                                                             | MIF vs. sCD74/MIF   | 3.87 |
|           |                                                             | sCD74 vs. sCD74/MIF | 1.93 |
| Figure 5I | Effect of sCD74/MIF in WT+AMD3100 vs. WT+ddH <sub>2</sub> O | Control             | 0.57 |
|           |                                                             | MIF                 | 1.99 |
|           |                                                             | sCD74               | 0.57 |
|           |                                                             | sCD74/MIF           | 0.96 |
| Figure 6A | human MIF ELISA                                             | Healthy vs. CHD     | 3.35 |
|           |                                                             | Healthy vs. HF      | 2.43 |
|           |                                                             | CHD vs. HF          | 1.52 |
| Figure 6B | human sCD74 ELISA                                           | Healthy vs. CHD     | 0.32 |



|                  |                                                  |                     |      |
|------------------|--------------------------------------------------|---------------------|------|
|                  |                                                  | Healthy vs. HF      | 0.11 |
|                  |                                                  | CHD vs. HF          | 0.54 |
| Figure 6C        | sCD74/MIF ratio                                  | Healthy vs. CHD     | 1.02 |
|                  |                                                  | Healthy vs. HF      | 1.12 |
|                  |                                                  | CHD vs. HF          | 0.69 |
| Suppl. Figure 2A | $\alpha$ -SMA                                    | Ctrl vs. MIF        | 0.66 |
|                  |                                                  | Ctrl vs. sCD74      | 0.04 |
|                  |                                                  | Ctrl vs. sCD74/MIF  | 0.10 |
|                  |                                                  | MIF vs. sCD74/MIF   | 0.37 |
|                  |                                                  | sCD74 vs. sCD74/MIF | 0.08 |
|                  | Col1a1                                           | Ctrl vs. MIF        | 0.53 |
|                  |                                                  | Ctrl vs. sCD74      | 0.25 |
|                  |                                                  | Ctrl vs. sCD74/MIF  | 0.97 |
|                  |                                                  | MIF vs. sCD74/MIF   | 0.50 |
|                  |                                                  | sCD74 vs. sCD74/MIF | 0.68 |
|                  | Fibronectin 1                                    | Ctrl vs. MIF        | 0.87 |
|                  |                                                  | Ctrl vs. sCD74      | 2.10 |
|                  |                                                  | Ctrl vs. sCD74/MIF  | 0.83 |
|                  |                                                  | MIF vs. sCD74/MIF   | 0.15 |
|                  |                                                  | sCD74 vs. sCD74/MIF | 0.02 |
| Suppl. Figure 5A | TNF $\alpha$ mRNA                                | Ctrl vs. MIF        | 0.70 |
|                  |                                                  | Ctrl vs. sCD74      | 0.39 |
|                  |                                                  | Ctrl vs. sCD74/MIF  | 0.81 |
|                  |                                                  | MIF vs. sCD74/MIF   | 0.05 |
|                  |                                                  | sCD74 vs. sCD74/MIF | 1.05 |
| Suppl. Figure 5B | soluble TNF $\alpha$                             | Ctrl vs. MIF        | 0.23 |
|                  |                                                  | Ctrl vs. sCD74      | 0.29 |
|                  |                                                  | Ctrl vs. sCD74/MIF  | 0.38 |
|                  |                                                  | MIF vs. sCD74/MIF   | 0.62 |
|                  |                                                  | sCD74 vs. sCD74/MIF | 0.67 |
| Suppl. Figure 5D | Intracellular TNF $\alpha$ at 10h                | Ctrl vs. MIF        | 0.60 |
|                  |                                                  | Ctrl vs. sCD74      | 1.36 |
|                  |                                                  | Ctrl vs. sCD74/MIF  | 1.19 |
|                  |                                                  | MIF vs. sCD74/MIF   | 0.09 |
|                  |                                                  | sCD74 vs. sCD74/MIF | 0.12 |
| Suppl. Figure 5E | Effects within the donor group after 6h          | Ctrl vs. MIF        | 0.16 |
|                  |                                                  | Ctrl vs. sCD74      | 0.49 |
|                  |                                                  | Ctrl vs. sCD74/MIF  | 1.76 |
|                  | Effects within the recipient group after 6h      | Ctrl vs. MIF        | 0.06 |
|                  |                                                  | Ctrl vs. sCD74      | 0.44 |
|                  |                                                  | Ctrl vs. sCD74/MIF  | 0.61 |
|                  | Effect of sCD74/MIF in donor vs. recipient group | Ctrl vs. MIF        | 0.04 |
|                  |                                                  | Ctrl vs. sCD74      | 0.12 |
|                  |                                                  | Ctrl vs. sCD74/MIF  | 1.00 |
| Suppl. Figure 5F | Effects within the donor group after 10h         | Ctrl vs. MIF        | 1.95 |
|                  |                                                  | Ctrl vs. sCD74      | 1.35 |
|                  |                                                  | Ctrl vs. sCD74/MIF  | 2.99 |

|                   |                                                        |                     |      |
|-------------------|--------------------------------------------------------|---------------------|------|
|                   | Effects within the recipient group after 10h           | Ctrl vs. MIF        | 0.07 |
|                   |                                                        | Ctrl vs. sCD74      | 0.29 |
|                   |                                                        | Ctrl vs. sCD74/MIF  | 1.75 |
|                   | Effect of sCD74/MIF in donor vs. recipient group       | Ctrl vs. MIF        | 2.08 |
|                   |                                                        | Ctrl vs. sCD74      | 0.87 |
|                   |                                                        | Ctrl vs. sCD74/MIF  | 2.25 |
| Suppl. Figure 8A  | Oasl2 mRNA                                             | Ctrl vs. MIF        | 0.69 |
|                   |                                                        | Ctrl vs. sCD74      | 1.22 |
|                   |                                                        | Ctrl vs. sCD74/MIF  | 1.32 |
|                   |                                                        | MIF vs. sCD74/MIF   | 0.93 |
|                   |                                                        | sCD74 vs. sCD74/MIF | 0.44 |
| Suppl. Figure 8B  | Tgtp2 mRNA                                             | Ctrl vs. MIF        | 1.03 |
|                   |                                                        | Ctrl vs. sCD74      | 1.02 |
|                   |                                                        | Ctrl vs. sCD74/MIF  | 1.10 |
|                   |                                                        | MIF vs. sCD74/MIF   | 0.31 |
|                   |                                                        | sCD74 vs. sCD74/MIF | 0.14 |
| Suppl. Figure 8C  | Ccl2 mRNA                                              | Ctrl vs. MIF        | 1.07 |
|                   |                                                        | Ctrl vs. sCD74      | 0.56 |
|                   |                                                        | Ctrl vs. sCD74/MIF  | 1.83 |
|                   |                                                        | MIF vs. sCD74/MIF   | 0.41 |
|                   |                                                        | sCD74 vs. sCD74/MIF | 1.46 |
| Suppl. Figure 8D  | Ccl7 mRNA                                              | Ctrl vs. MIF        | 1.41 |
|                   |                                                        | Ctrl vs. sCD74      | 1.36 |
|                   |                                                        | Ctrl vs. sCD74/MIF  | 3.65 |
|                   |                                                        | MIF vs. sCD74/MIF   | 1.18 |
|                   |                                                        | sCD74 vs. sCD74/MIF | 2.82 |
| Suppl. Figure 15A | WT: CD74 surface expression at 0.5h                    | Ctrl vs. MIF        | 0.11 |
|                   |                                                        | Ctrl vs. sCD74      | 0.13 |
|                   |                                                        | Ctrl vs. sCD74/MIF  | 0.48 |
|                   |                                                        | MIF vs. sCD74/MIF   | 0.38 |
|                   |                                                        | sCD74 vs. sCD74/MIF | 0.41 |
| Suppl. Figure 15B | WT: CXCR2 surface expression at 0.5h                   | Ctrl vs. MIF        | 0.49 |
|                   |                                                        | Ctrl vs. sCD74      | 0.12 |
|                   |                                                        | Ctrl vs. sCD74/MIF  | 0.84 |
|                   |                                                        | MIF vs. sCD74/MIF   | 0.35 |
|                   |                                                        | sCD74 vs. sCD74/MIF | 0.81 |
|                   | Cd74 <sup>-/-</sup> : CXCR2 surface expression at 0.5h | Ctrl vs. MIF        | 0.21 |
|                   |                                                        | Ctrl vs. sCD74      | 0.78 |
|                   |                                                        | Ctrl vs. sCD74/MIF  | 0.32 |
|                   |                                                        | MIF vs. sCD74/MIF   | 0.13 |
|                   |                                                        | sCD74 vs. sCD74/MIF | 1.07 |
| Suppl. Figure 15C | WT: CXCR4 surface expression at 0.5h                   | Ctrl vs. MIF        | 0.80 |
|                   |                                                        | Ctrl vs. sCD74      | 0.12 |
|                   |                                                        | Ctrl vs. sCD74/MIF  | 0.75 |
|                   |                                                        | MIF vs. sCD74/MIF   | 0.16 |
|                   |                                                        | sCD74 vs. sCD74/MIF | 0.82 |
|                   |                                                        | Ctrl vs. MIF        | 0.02 |

|                   |                                                        |                     |      |
|-------------------|--------------------------------------------------------|---------------------|------|
|                   |                                                        | Ctrl vs. sCD74      | 0.25 |
|                   | Cd74 <sup>-/-</sup> : CXCR4 surface expression at 0.5h | Ctrl vs. sCD74/MIF  | 0.03 |
|                   |                                                        | MIF vs. sCD74/MIF   | 0.02 |
|                   |                                                        | sCD74 vs. sCD74/MIF | 0.25 |
| Suppl. Figure 15D | WT: CD74 surface expression at 4h                      | Ctrl vs. MIF        | 1.71 |
|                   |                                                        | Ctrl vs. sCD74      | 0.01 |
|                   |                                                        | Ctrl vs. sCD74/MIF  | 0.02 |
|                   |                                                        | MIF vs. sCD74/MIF   | 2.10 |
|                   |                                                        | sCD74 vs. sCD74/MIF | 0.03 |
| Suppl. Figure 15E | WT: CXCR2 surface expression at 4h                     | Ctrl vs. MIF        | 0.33 |
|                   |                                                        | Ctrl vs. sCD74      | 0.11 |
|                   |                                                        | Ctrl vs. sCD74/MIF  | 1.59 |
|                   |                                                        | MIF vs. sCD74/MIF   | 1.20 |
|                   |                                                        | sCD74 vs. sCD74/MIF | 2.00 |
|                   | Cd74 <sup>-/-</sup> : CXCR2 surface expression at 4h   | Ctrl vs. MIF        | 2.17 |
|                   |                                                        | Ctrl vs. sCD74      | 0.98 |
|                   |                                                        | Ctrl vs. sCD74/MIF  | 1.91 |
|                   |                                                        | MIF vs. sCD74/MIF   | 0.18 |
|                   |                                                        | sCD74 vs. sCD74/MIF | 2.67 |
| Suppl. Figure 15F | WT: CXCR4 surface expression at 4h                     | Ctrl vs. MIF        | 4.11 |
|                   |                                                        | Ctrl vs. sCD74      | 2.82 |
|                   |                                                        | Ctrl vs. sCD74/MIF  | 5.20 |
|                   |                                                        | MIF vs. sCD74/MIF   | 2.49 |
|                   |                                                        | sCD74 vs. sCD74/MIF | 3.60 |
|                   | Cd74 <sup>-/-</sup> : CXCR4 surface expression at 4h   | Ctrl vs. MIF        | 0.21 |
|                   |                                                        | Ctrl vs. sCD74      | 0.15 |
|                   |                                                        | Ctrl vs. sCD74/MIF  | 0.41 |
|                   |                                                        | MIF vs. sCD74/MIF   | 0.23 |
|                   |                                                        | sCD74 vs. sCD74/MIF | 0.23 |
| Suppl. Figure 15G | WT: CD74 surface expression at 8h                      | Ctrl vs. MIF        | 1.07 |
|                   |                                                        | Ctrl vs. sCD74      | 0.27 |
|                   |                                                        | Ctrl vs. sCD74/MIF  | 5.62 |
|                   |                                                        | MIF vs. sCD74/MIF   | 5.14 |
|                   |                                                        | sCD74 vs. sCD74/MIF | 2.26 |
| Suppl. Figure 15H | WT: CXCR2 surface expression at 8h                     | Ctrl vs. MIF        | 0.01 |
|                   |                                                        | Ctrl vs. sCD74      | 0.37 |
|                   |                                                        | Ctrl vs. sCD74/MIF  | 2.66 |
|                   |                                                        | MIF vs. sCD74/MIF   | 1.68 |
|                   |                                                        | sCD74 vs. sCD74/MIF | 2.76 |
|                   | Cd74 <sup>-/-</sup> : CXCR2 surface expression at 8h   | Ctrl vs. MIF        | 1.18 |
|                   |                                                        | Ctrl vs. sCD74      | 0.53 |
|                   |                                                        | Ctrl vs. sCD74/MIF  | 1.15 |
|                   |                                                        | MIF vs. sCD74/MIF   | 0.04 |
|                   |                                                        | sCD74 vs. sCD74/MIF | 1.47 |
| Suppl. Figure 15I | WT: CXCR4 surface expression at 8h                     | Ctrl vs. MIF        | 3.42 |
|                   |                                                        | Ctrl vs. sCD74      | 2.39 |
|                   |                                                        | Ctrl vs. sCD74/MIF  | 3.00 |

|                     |                                                        |                                                      |                    |      |
|---------------------|--------------------------------------------------------|------------------------------------------------------|--------------------|------|
|                     |                                                        | MIF vs. sCD74/MIF                                    | 0.36               |      |
|                     |                                                        | sCD74 vs. sCD74/MIF                                  | 1.47               |      |
|                     |                                                        | Cd74 <sup>-/-</sup> : CXCR4 surface expression at 8h | Ctrl vs. MIF       | 0.21 |
|                     |                                                        |                                                      | Ctrl vs. sCD74     | 0.13 |
|                     |                                                        |                                                      | Ctrl vs. sCD74/MIF | 0.59 |
|                     |                                                        |                                                      | MIF vs. sCD74/MIF  | 0.41 |
| sCD74 vs. sCD74/MIF | 0.49                                                   |                                                      |                    |      |
| Suppl. Figure 16A   | WT: CD74 surface expression at 5min                    | Ctrl vs. MIF                                         | 1.67               |      |
|                     |                                                        | Ctrl vs. sCD74                                       | 2.08               |      |
|                     |                                                        | Ctrl vs. sCD74/MIF                                   | 2.65               |      |
|                     |                                                        | MIF vs. sCD74/MIF                                    | 0.37               |      |
|                     |                                                        | sCD74 vs. sCD74/MIF                                  | 0.32               |      |
| Suppl. Figure 16B   | WT: TLR2 surface expression at 0.5h                    | Ctrl vs. MIF                                         | 0.28               |      |
|                     |                                                        | Ctrl vs. sCD74                                       | 0.35               |      |
|                     |                                                        | Ctrl vs. sCD74/MIF                                   | 0.63               |      |
|                     |                                                        | MIF vs. sCD74/MIF                                    | 0.43               |      |
|                     | sCD74 vs. sCD74/MIF                                    | 0.39                                                 |                    |      |
|                     | Cd74 <sup>-/-</sup> : TLR2 surface expression at 0.5h  | Ctrl vs. MIF                                         | 0.63               |      |
|                     |                                                        | Ctrl vs. sCD74                                       | 0.01               |      |
|                     |                                                        | Ctrl vs. sCD74/MIF                                   | 0.68               |      |
| MIF vs. sCD74/MIF   |                                                        | 0.14                                                 |                    |      |
| sCD74 vs. sCD74/MIF | 0.65                                                   |                                                      |                    |      |
| Suppl. Figure 16C   | WT: TLR4 surface expression at 0.5h                    | Ctrl vs. MIF                                         | 0.07               |      |
|                     |                                                        | Ctrl vs. sCD74                                       | 0.13               |      |
|                     |                                                        | Ctrl vs. sCD74/MIF                                   | 0.21               |      |
|                     |                                                        | MIF vs. sCD74/MIF                                    | 0.29               |      |
|                     | sCD74 vs. sCD74/MIF                                    | 0.35                                                 |                    |      |
|                     | Cd74 <sup>-/-</sup> : TLR4 surface expression at 0.5h  | Ctrl vs. MIF                                         | 0.14               |      |
|                     |                                                        | Ctrl vs. sCD74                                       | 0.67               |      |
|                     |                                                        | Ctrl vs. sCD74/MIF                                   | 3.62               |      |
| MIF vs. sCD74/MIF   |                                                        | 1.19                                                 |                    |      |
| sCD74 vs. sCD74/MIF | 0.50                                                   |                                                      |                    |      |
| Suppl. Figure 16D   | WT: TNFRI surface expression at 0.5h                   | Ctrl vs. MIF                                         | 0.17               |      |
|                     |                                                        | Ctrl vs. sCD74                                       | 0.14               |      |
|                     |                                                        | Ctrl vs. sCD74/MIF                                   | 0.09               |      |
|                     |                                                        | MIF vs. sCD74/MIF                                    | 0.08               |      |
|                     | sCD74 vs. sCD74/MIF                                    | 0.23                                                 |                    |      |
|                     | Cd74 <sup>-/-</sup> : TNFRI surface expression at 0.5h | Ctrl vs. MIF                                         | 1.81               |      |
|                     |                                                        | Ctrl vs. sCD74                                       | 3.98               |      |
|                     |                                                        | Ctrl vs. sCD74/MIF                                   | 2.91               |      |
| MIF vs. sCD74/MIF   |                                                        | 0.28                                                 |                    |      |
| sCD74 vs. sCD74/MIF | 0.00                                                   |                                                      |                    |      |
| Suppl. Figure 16E   | WT: TLR2 surface expression at 4h                      | Ctrl vs. MIF                                         | 1.23               |      |
|                     |                                                        | Ctrl vs. sCD74                                       | 0.72               |      |
|                     |                                                        | Ctrl vs. sCD74/MIF                                   | 1.25               |      |
|                     |                                                        | MIF vs. sCD74/MIF                                    | 0.61               |      |
| sCD74 vs. sCD74/MIF | 0.88                                                   |                                                      |                    |      |

|                   |                                                      |                     |      |
|-------------------|------------------------------------------------------|---------------------|------|
|                   |                                                      | Ctrl vs. MIF        | 0.80 |
|                   |                                                      | Ctrl vs. sCD74      | 0.17 |
|                   | Cd74 <sup>-/-</sup> : TLR2 surface expression at 4h  | Ctrl vs. sCD74/MIF  | 0.98 |
|                   |                                                      | MIF vs. sCD74/MIF   | 0.53 |
|                   |                                                      | sCD74 vs. sCD74/MIF | 1.00 |
| Suppl. Figure 16F | WT: TLR4 surface expression at 4h                    | Ctrl vs. MIF        | 0.70 |
|                   |                                                      | Ctrl vs. sCD74      | 0.23 |
|                   |                                                      | Ctrl vs. sCD74/MIF  | 0.46 |
|                   |                                                      | MIF vs. sCD74/MIF   | 0.33 |
|                   |                                                      | sCD74 vs. sCD74/MIF | 0.26 |
|                   | Cd74 <sup>-/-</sup> : TLR4 surface expression at 4h  | Ctrl vs. MIF        | 0.67 |
|                   |                                                      | Ctrl vs. sCD74      | 2.06 |
|                   |                                                      | Ctrl vs. sCD74/MIF  | 0.19 |
|                   |                                                      | MIF vs. sCD74/MIF   | 0.36 |
|                   |                                                      | sCD74 vs. sCD74/MIF | 1.28 |
| Suppl. Figure 16G | WT: TNFRI surface expression at 4h                   | Ctrl vs. MIF        | 0.32 |
|                   |                                                      | Ctrl vs. sCD74      | 0.43 |
|                   |                                                      | Ctrl vs. sCD74/MIF  | 0.78 |
|                   |                                                      | MIF vs. sCD74/MIF   | 0.23 |
|                   |                                                      | sCD74 vs. sCD74/MIF | 0.29 |
|                   | Cd74 <sup>-/-</sup> : TNFRI surface expression at 4h | Ctrl vs. MIF        | 0.03 |
|                   |                                                      | Ctrl vs. sCD74      | 0.40 |
|                   |                                                      | Ctrl vs. sCD74/MIF  | 0.70 |
|                   |                                                      | MIF vs. sCD74/MIF   | 0.64 |
|                   |                                                      | sCD74 vs. sCD74/MIF | 0.51 |
| Suppl. Figure 16H | WT: TLR2 surface expression at 8h                    | Ctrl vs. MIF        | 1.51 |
|                   |                                                      | Ctrl vs. sCD74      | 0.00 |
|                   |                                                      | Ctrl vs. sCD74/MIF  | 1.77 |
|                   |                                                      | MIF vs. sCD74/MIF   | 0.50 |
|                   |                                                      | sCD74 vs. sCD74/MIF | 1.79 |
|                   | Cd74 <sup>-/-</sup> : TLR2 surface expression at 8h  | Ctrl vs. MIF        | 0.73 |
|                   |                                                      | Ctrl vs. sCD74      | 0.11 |
|                   |                                                      | Ctrl vs. sCD74/MIF  | 0.84 |
|                   |                                                      | MIF vs. sCD74/MIF   | 0.45 |
|                   |                                                      | sCD74 vs. sCD74/MIF | 0.77 |
| Suppl. Figure 16I | WT: TLR4 surface expression at 8h                    | Ctrl vs. MIF        | 0.74 |
|                   |                                                      | Ctrl vs. sCD74      | 0.84 |
|                   |                                                      | Ctrl vs. sCD74/MIF  | 0.89 |
|                   |                                                      | MIF vs. sCD74/MIF   | 0.18 |
|                   |                                                      | sCD74 vs. sCD74/MIF | 0.20 |
|                   | Cd74 <sup>-/-</sup> : TLR4 surface expression at 8h  | Ctrl vs. MIF        | 0.99 |
|                   |                                                      | Ctrl vs. sCD74      | 1.18 |
|                   |                                                      | Ctrl vs. sCD74/MIF  | 1.45 |
|                   |                                                      | MIF vs. sCD74/MIF   | 1.00 |
|                   |                                                      | sCD74 vs. sCD74/MIF | 1.89 |
| Suppl. Figure 16J | WT: TNFRI surface expression at 8h                   | Ctrl vs. MIF        | 0.04 |
|                   |                                                      | Ctrl vs. sCD74      | 0.51 |

|  |                                                      |                     |      |
|--|------------------------------------------------------|---------------------|------|
|  |                                                      | Ctrl vs. sCD74/MIF  | 0.19 |
|  |                                                      | MIF vs. sCD74/MIF   | 0.22 |
|  |                                                      | sCD74 vs. sCD74/MIF | 0.62 |
|  | Cd74 <sup>-/-</sup> : TNFRI surface expression at 8h | Ctrl vs. MIF        | 0.86 |
|  |                                                      | Ctrl vs. sCD74      | 2.23 |
|  |                                                      | Ctrl vs. sCD74/MIF  | 0.53 |
|  |                                                      | MIF vs. sCD74/MIF   | 0.09 |
|  |                                                      | sCD74 vs. sCD74/MIF | 0.19 |

**Figure S1. Experimental Setup.**

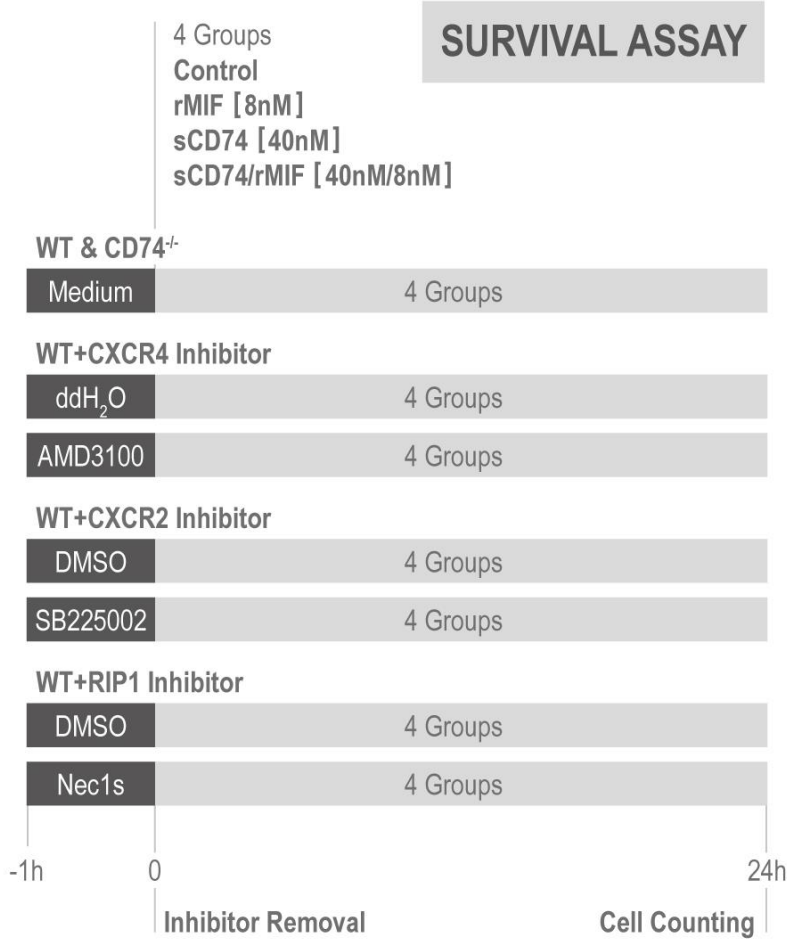

Cardiac myofibroblasts were randomized into four groups, which were incubated either with medium (group1: control), 8 nmol/L rMIF (group2: rMIF), 40 nmol/L sCD74 (group3: sCD74) or five-fold molar excess of sCD74 to rMIF (group4: sCD74/rMIF) for 24 h. For inhibition studies in WT myofibroblasts, cells were treated with either the inhibitor compound (AMD3100, SB225002, Nec1s) or the appropriate solvent as control (ddH<sub>2</sub>O or DMSO). Following 1 h of incubation, both solvent and inhibitor-pretreated cells were stimulated either with medium, rMIF, sCD74 or sCD74/rMIF and maintained for further 20-24 h.

**Figure S2. Treatment with sCD74/MIF did not induce de-differentiation of myofibroblasts to a quiescent fibroblast.**

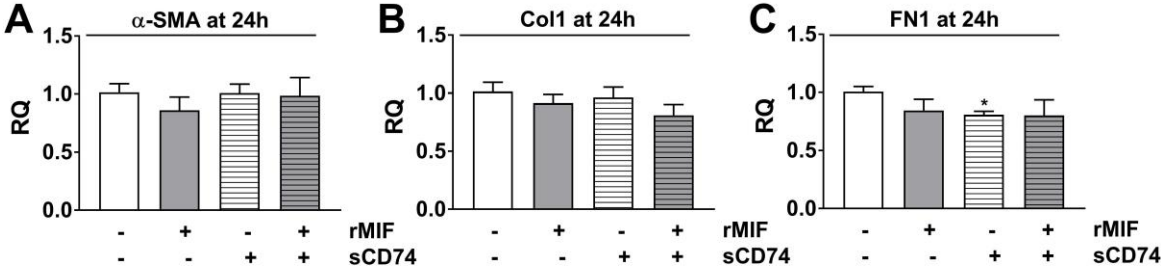

Following treatment of cardiac myofibroblasts with vehicle, sCD74, rMIF or sCD74/rMIF for 24 h, mRNA expression of **(A)** α-smooth muscle actin (α-SMA), **(B)** collagen 1α1 (Col1α1) and **(C)** fibronectin 1 (FN1) were assessed via RT-qPCR method. Data represent mean±SEM of six independent experiments and were analyzed with a two-tailed, unpaired t-test corrected for multiple comparison (n=5). \*p<0.05 vs. control.



Figure S3. Representative blots of cleaved caspase-3 and GAPDH 10 h after treatment with increasing concentrations of sCD74 either with or without MIF.

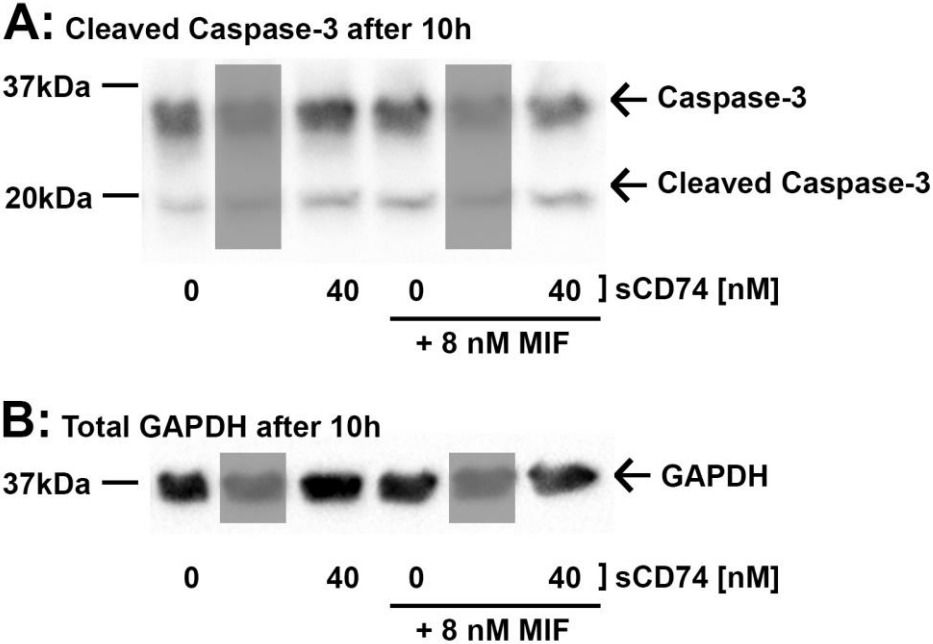

WT myofibroblasts were stimulated with medium and 40 nmol/L sCD74 either in the absence or presence of 8 nmol/L rMIF. **(A)** Full-length and cleaved caspase-3 and **(B)** GAPDH were assessed 10 h after stimulation by Western blotting.

Figure S4. Representative blots of pRIP3, RIP3 and GAPDH 10 h after treatment with increasing concentrations of sCD74 either with or without MIF.

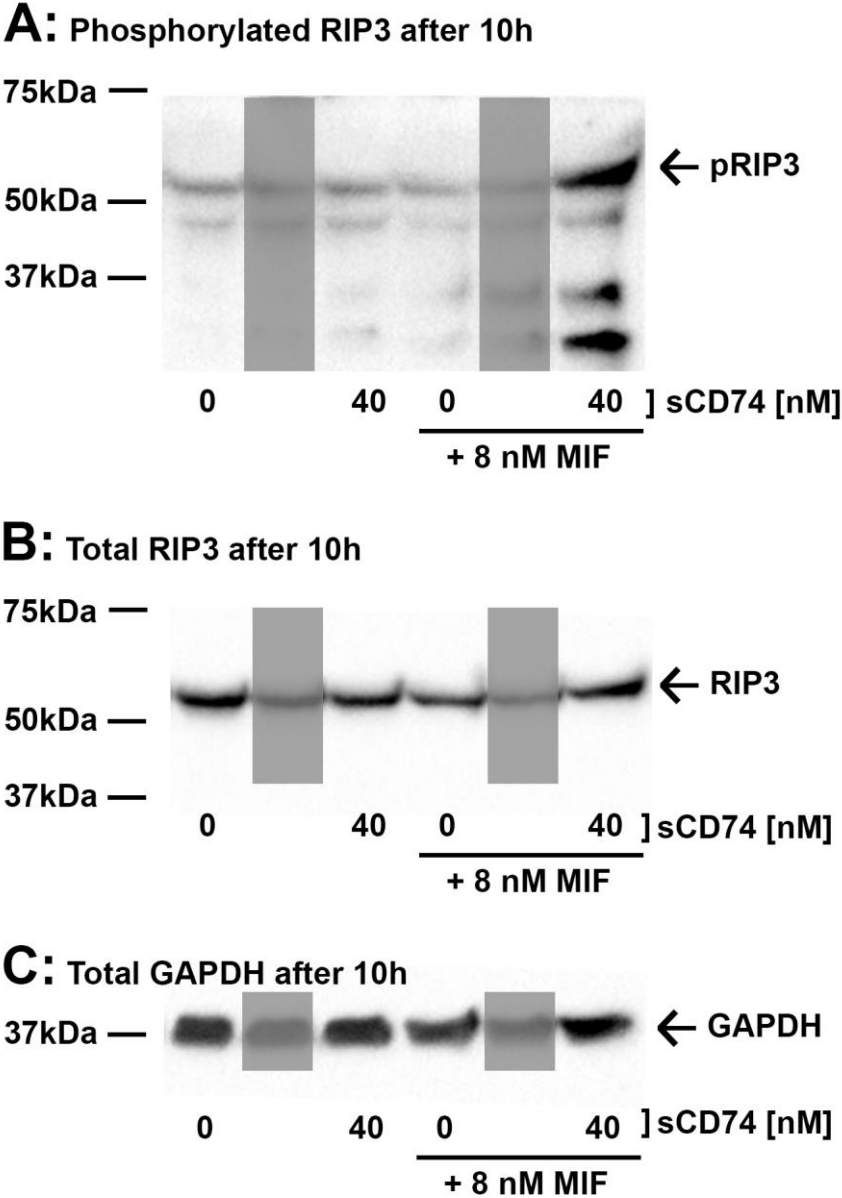

WT myofibroblasts were stimulated with medium and 40 nmol/L sCD74 either in the absence or presence of 8 nmol/L rMIF. **(A)** Phosphorylation of RIP3, **(B)** total RIP3 and **(C)** GAPDH were assessed 10 h after stimulation by Western blotting.

**Figure S5. TNF $\alpha$  could not be identified as mediator of sCD74/MIF-induced necroptosis.**

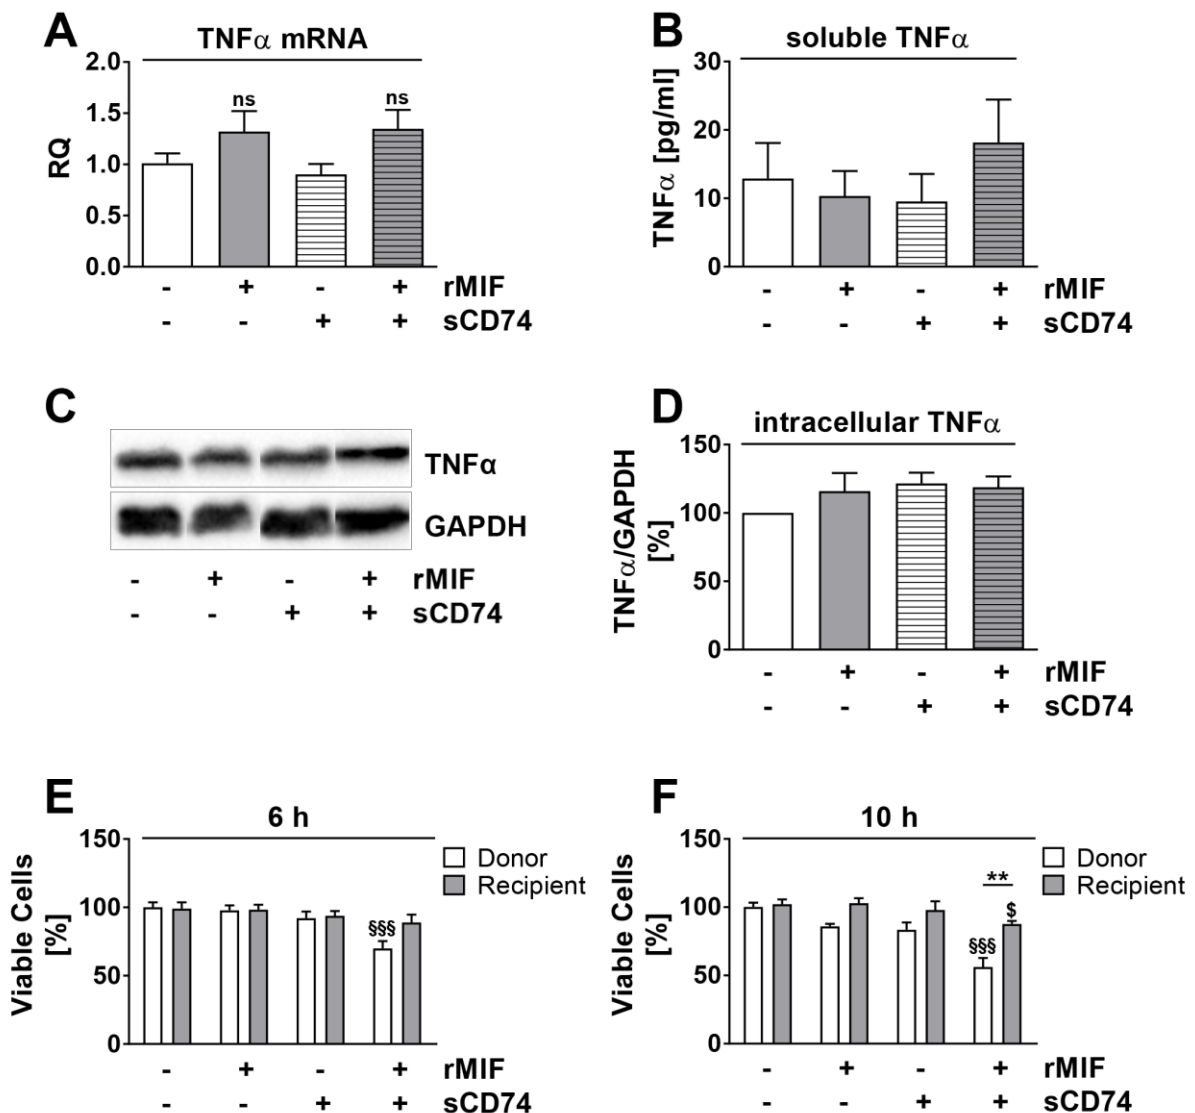

WT fibroblasts were stimulated solitarily or simultaneously with 40 nmol/L sCD74 and 8 nmol/L rMIF. **(A)** mRNA levels (via RT-PCR) as well as **(B)** extracellular (via ELISA) and **(C-D)** intracellular protein levels of TNF $\alpha$  (via Western blotting) were determined. Instead of showing the whole blot, relevant bands were cut out and arranged in the respective order. The uncut blots are shown in Figure S6). **(E-F)** For the supernatant transfer experiments, WT myofibroblasts were stimulated solitarily or simultaneously with sCD74 and rMIF (donor). After supernatant was transferred to untreated WT cells (recipient). Both donor and recipient cells

were maintained for further 20-24 h followed by Trypan blue staining and automated counting. Data represent mean $\pm$ SEM of at least (A) eight, (B) six, (D) eight, (E) ten and (F) eight independent experiments. Data were analyzed with a two-tailed, unpaired t-test and corrected for multiple comparison (A-D: n=5; E-F: n=7) using Bonferroni posttest.  $^{\text{§§§}}p<0.001$  vs. control of donor cells;  $^{\text{§}}p<0.05$  vs. control of recipient cells;  $^{**}p<0.01$  donor vs. recipient.



**Figure S7. sCD74/MIF-dependent gene expression differs largely from those induced by MIF or sCD74.**

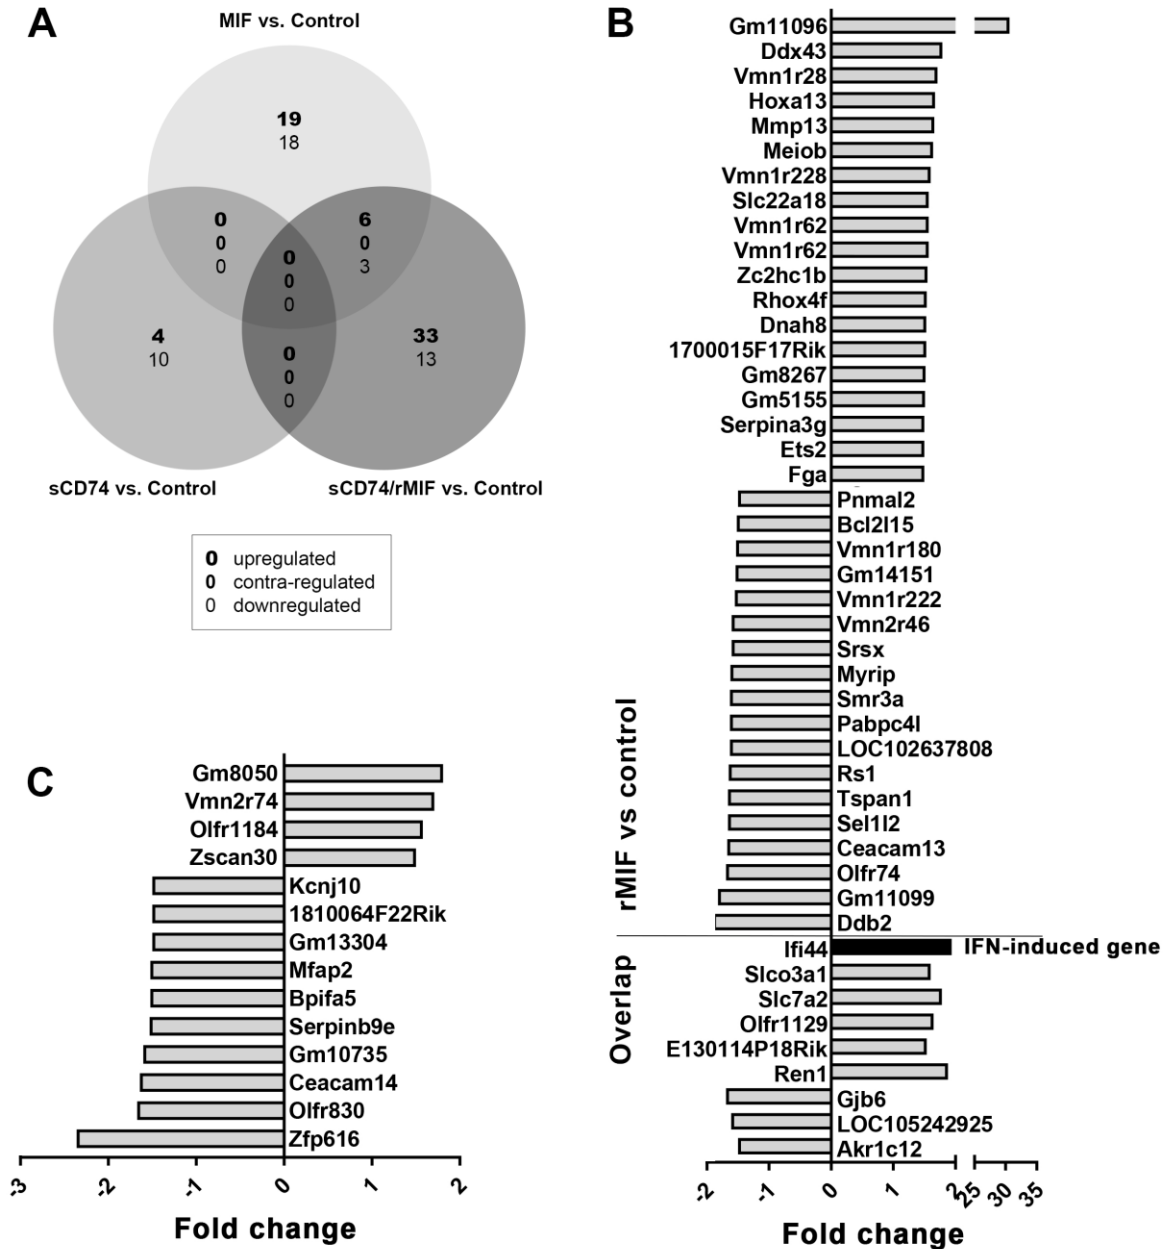

**(A)** Venn diagram of overlapping and unique effects of sCD74, rMIF and sCD74/rMIF on gene expression. A total of 115 genes with a fold change  $\geq 1.5$  among the differentially expressed genes are represented. Venn diagram was generated using Vennplex. **(B)** The genes with at least 1.5-fold change following rMIF treatment compared to control were depicted. The marginal overlap between rMIF and sCD74/rMIF stimulation were marked. **(C)** The genes with at least 1.5-fold change following

sCD74 treatment compared to control were depicted. Type I IFN-induced genes are labeled as black bars. Genes labeled as grey bars seem not to contribute to specialized function and pathways. Independent triplicates were performed. The corresponding p-values are listed in Table S1.

**Figure S8. Treatment with sCD74/MIF significantly upregulates gene expression of cytokines.**

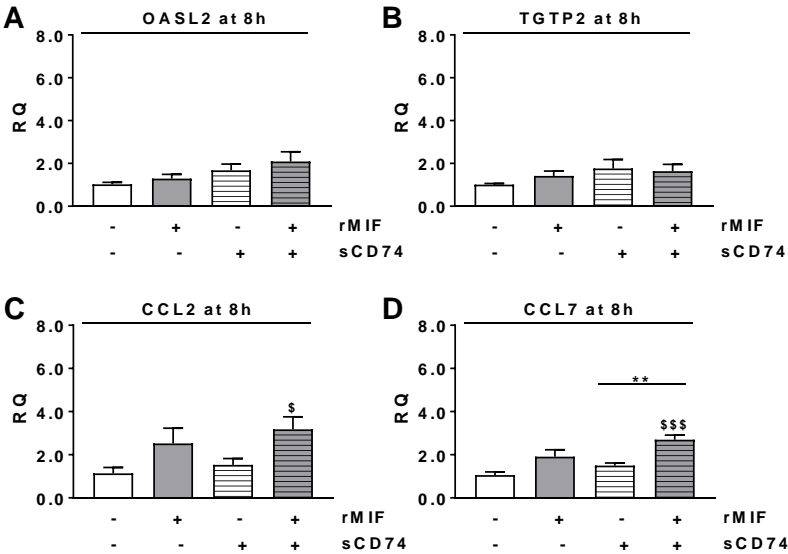

RT-qPCR was performed with the cDNA and Taqman probes. Data represent mean±SEM of at least four independent experiments and were analyzed with a two-tailed, unpaired t-test with multiple correction (n=5). <sup>\$</sup>p<0.05; <sup>\$\$\$</sup>p<0.001 vs. control respectively; <sup>\*\*</sup>p<0.01 vs. sCD74.

**Figure S9. Representative blots of pAKT, AKT and Tubulin 30 min after treatment with increasing concentrations of sCD74 either with or without MIF.**



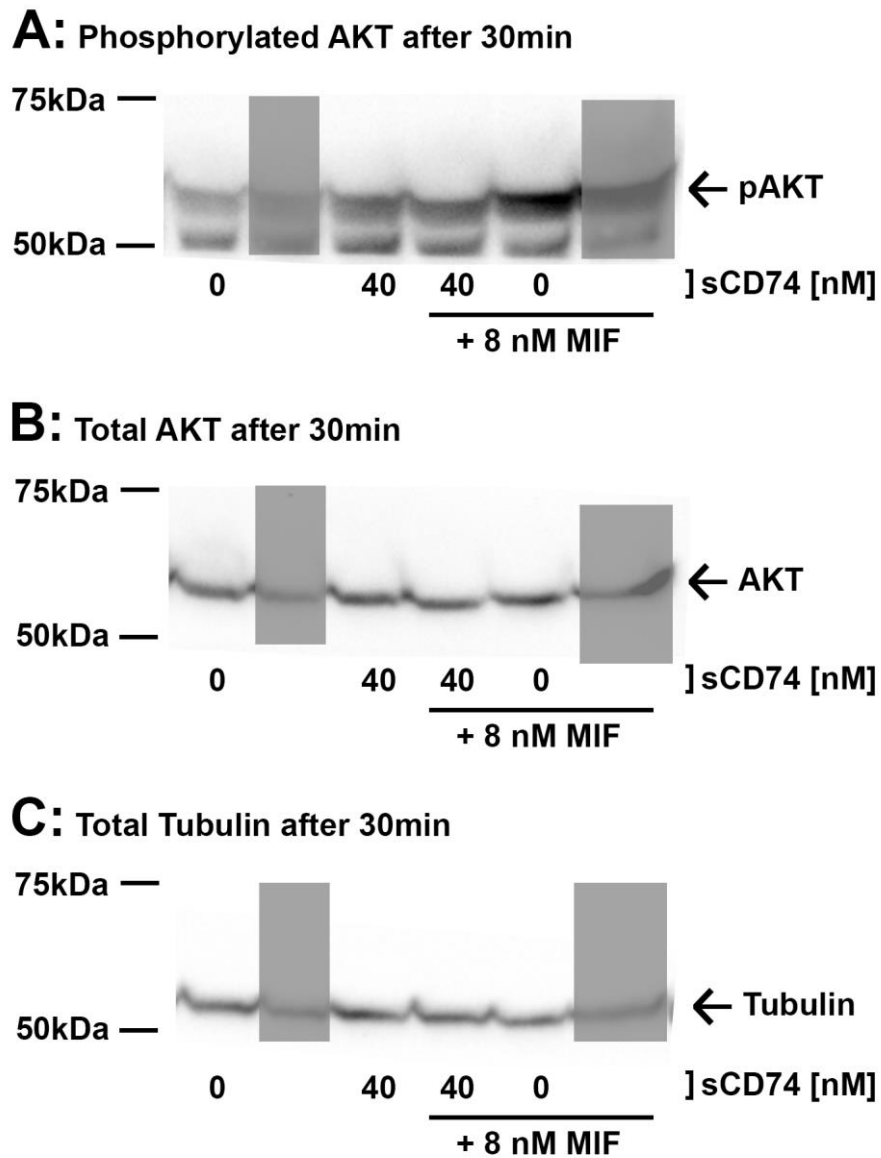

WT myofibroblasts were stimulated with medium and 40 nmol/L sCD74 either in the absence or presence of 8 nmol/L rMIF. **(A)** Phosphorylation of AKT, **(B)** total AKT and **(C)** Tubulin were assessed 30 min after stimulation by Western blotting.

**Figure S10.** Representative blots of pAKT, AKT and Tubulin 10 h after treatment with increasing concentrations of sCD74 either with or without MIF.

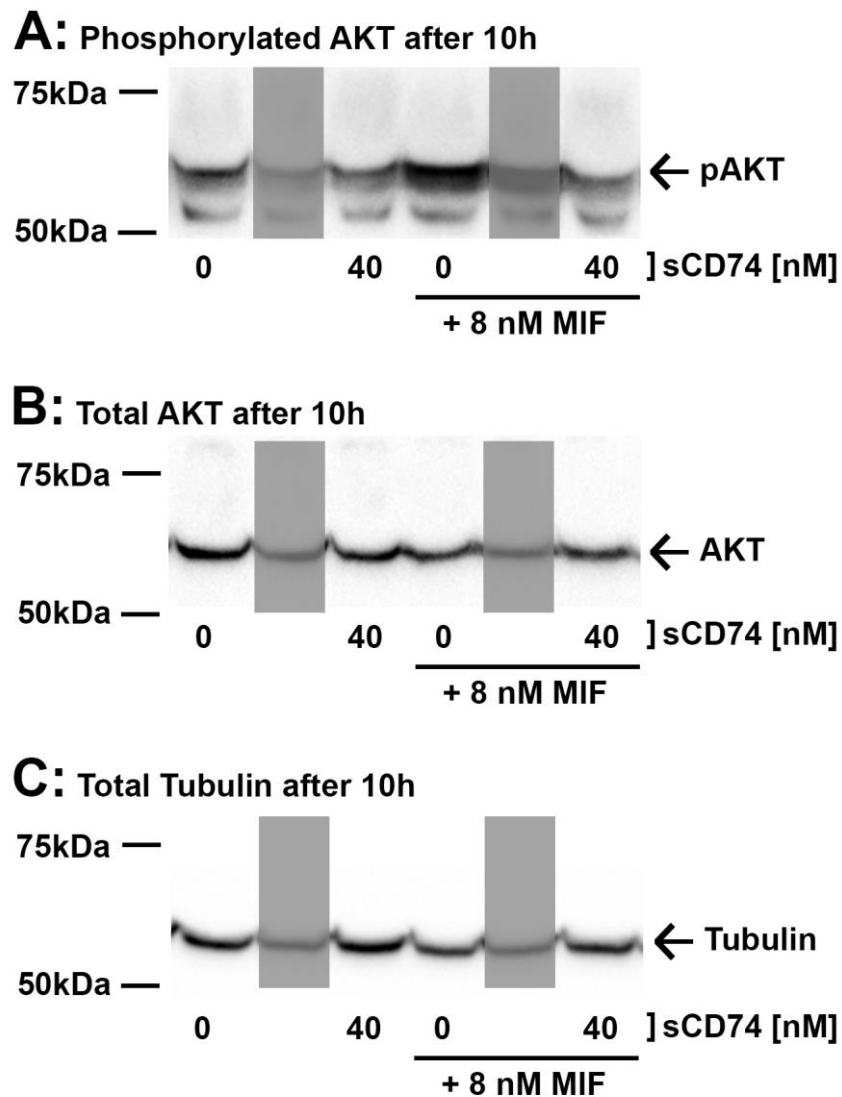

WT myofibroblasts were stimulated with medium and 40 nmol/L sCD74 either in the absence or presence of 8 nmol/L rMIF. **(A)** Phosphorylation of AKT, **(B)** total AKT and **(C)** Tubulin were assessed 10 h after stimulation by Western blotting.

**Figure S11. Representative blots of pp38, p38 and GAPDH 30 min after treatment with increasing concentrations of sCD74 either with or without MIF.**

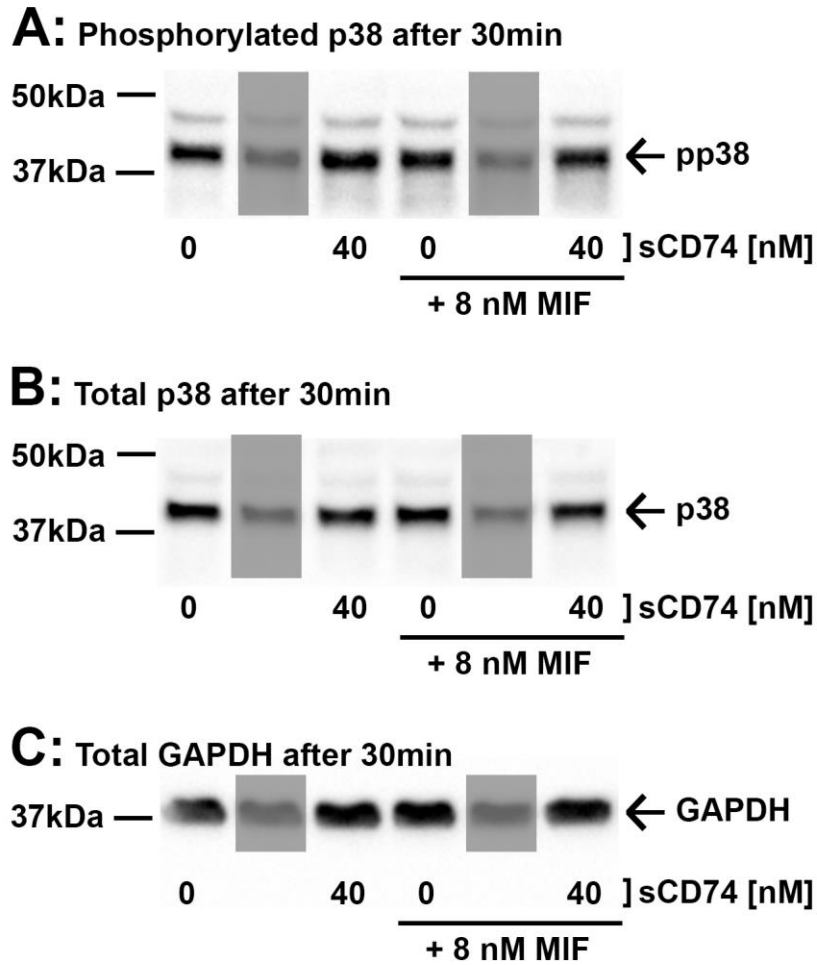

WT myofibroblasts were stimulated with medium and 40 nmol/L sCD74 either in the absence or presence of 8 nmol/L rMIF. **(A)** Phosphorylation of p38, **(B)** total p38 and **(C)** GAPDH were assessed 30 min after stimulation by Western blotting.

**Figure S12.** Representative blots of pp38, p38 and GAPDH 10 h after treatment with increasing concentrations of sCD74 either with or without MIF.

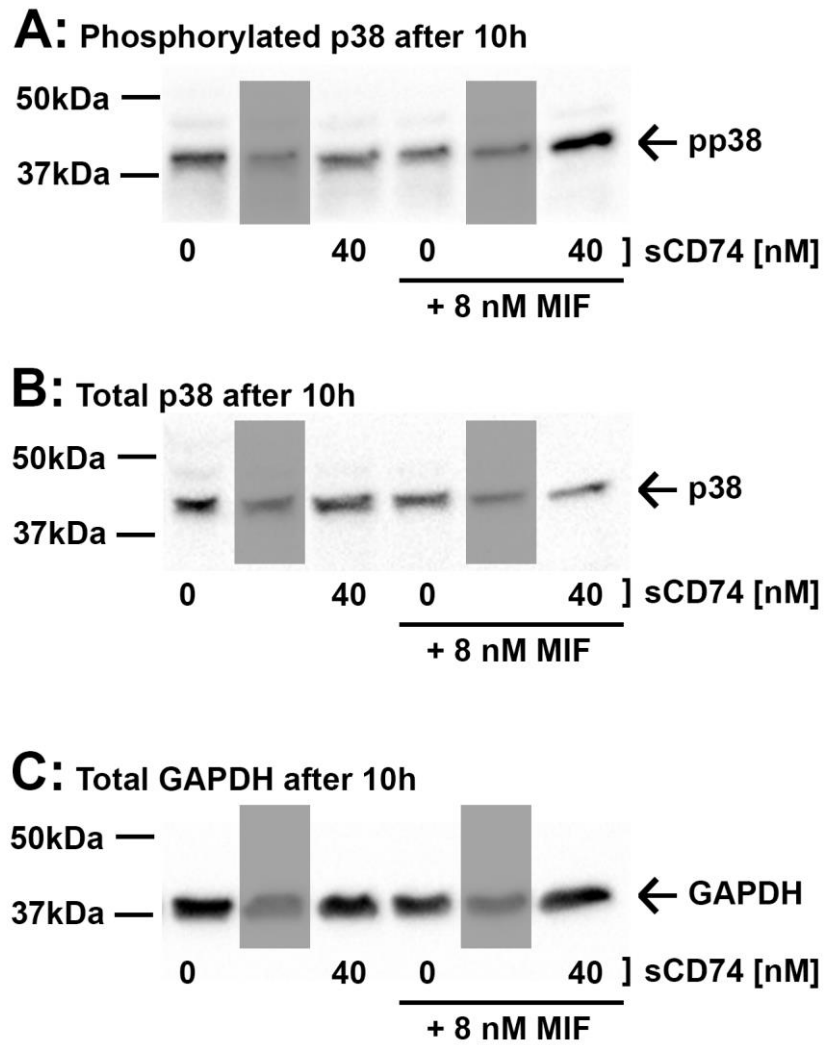

WT myofibroblasts were stimulated with medium and 40 nmol/L sCD74 either in the absence or presence of 8 nmol/L rMIF. **(A)** Phosphorylation of p38, **(B)** total p38 and **(C)** GAPDH were assessed 10 h after stimulation by Western blotting.

**Figure S13. Basal surface expression levels of MIF receptors CD74, CXCR2 and CXCR4 in WT and *Cd74*<sup>-/-</sup> myofibroblasts.**

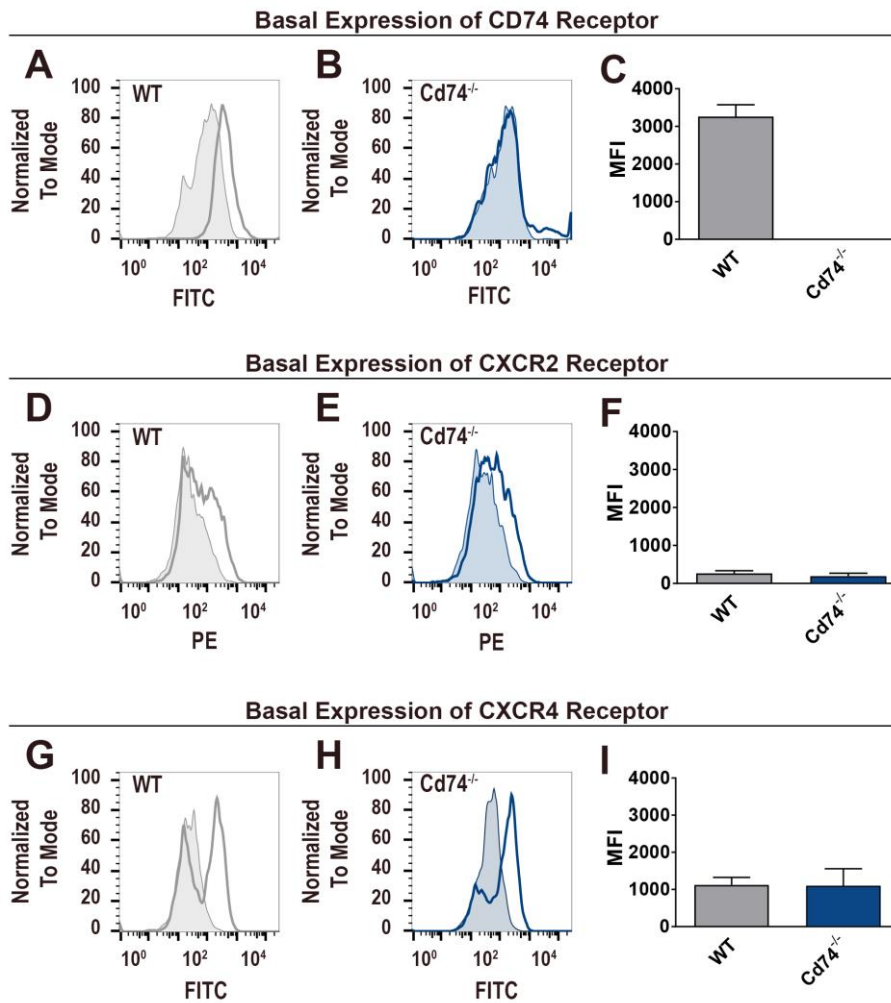

WT and *Cd74*<sup>-/-</sup> myofibroblasts were detached by scraping and cell surface expression of **(A-C)** CD74, **(D-F)** CXCR2 and **(G-I)** CXCR4 receptor were analyzed by flow cytometry. The median fluorescence intensity (MFI) of isotype control was subtracted from MFI of its appropriate antibody preparation. Data represent mean±SEM of at least three independent experiments.

**Figure S14. Basal surface expression of TLR2, TLR4 and TNFRI in WT and *Cd74*<sup>-/-</sup> myofibroblasts.**

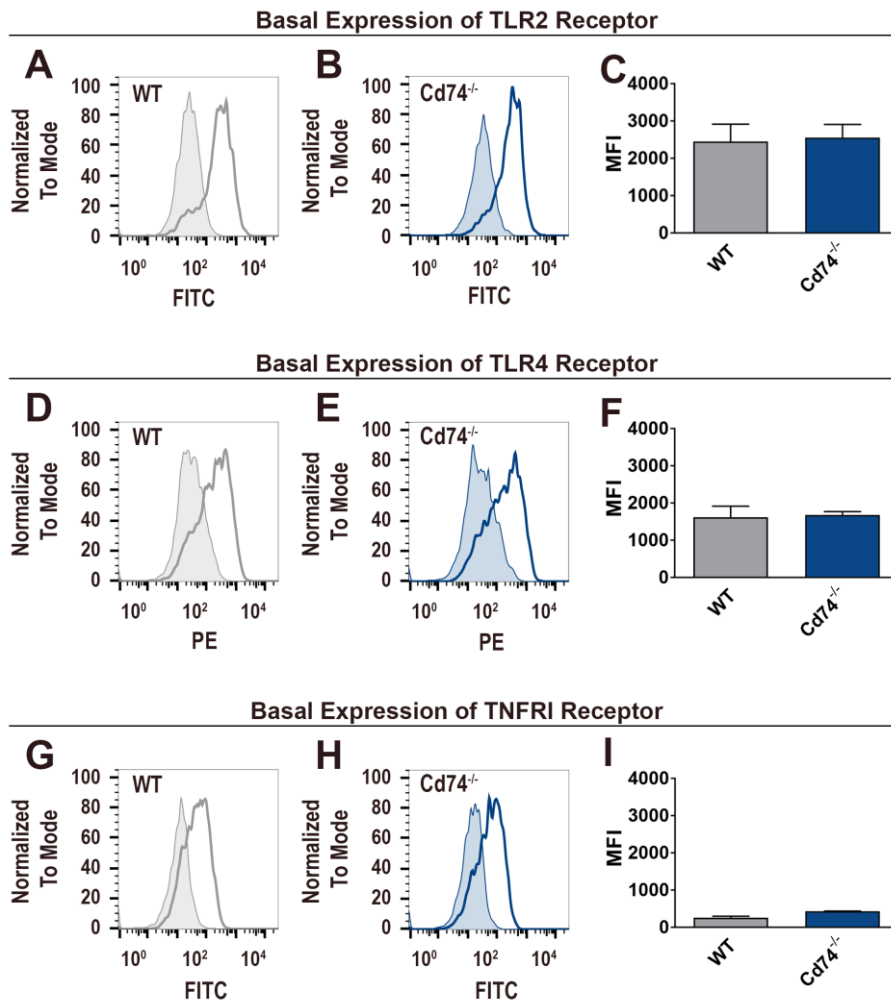

WT and *Cd74*<sup>-/-</sup> myofibroblasts were detached by scraping and cell surface expression of **(A-C)** TLR2, **(D-F)** TLR4 and **(G-I)** TNFR1 receptor were analyzed by flow cytometry. The median fluorescence intensity (MFI) of isotype control was subtracted from MFI of its appropriate antibody preparation. Data represent mean±SEM of at least three independent experiments.

**Figure S15. sCD74/rMIF induces rapid and prolonged chemokine receptor internalization.**

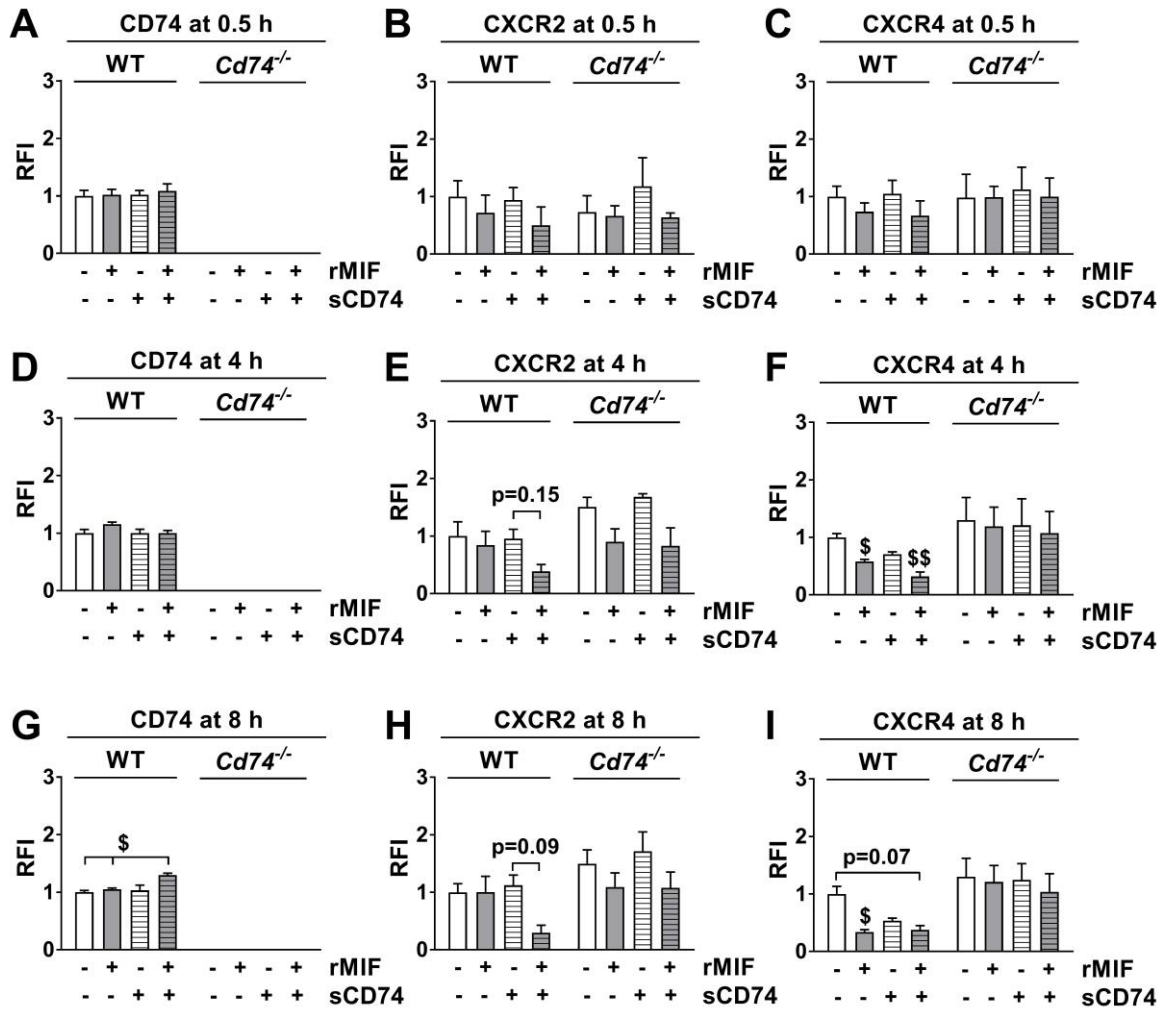

WT and *Cd74*<sup>-/-</sup> myofibroblasts were stimulated with sCD74 either alone or with MIF for (A-C) 0.5 h, (D-F) 4 h and (G-I) 8 h. Subsequently, cells were detached by scraping and cell surface expression of (A, D, G) CD74, (B, E, H) CXCR2 and (C, F, I) CXCR4 receptor were analyzed by flow cytometry. The relative fluorescence intensity (RFI) of isotype control was subtracted from MFI of its appropriate antibody preparation. Data represent mean $\pm$ SEM of at least three independent experiments. \$p<0.05, \$\$p<0.01 vs. control respectively.

Figure S16. Increased TLR2 expression following sCD74/rMIF stimulation.

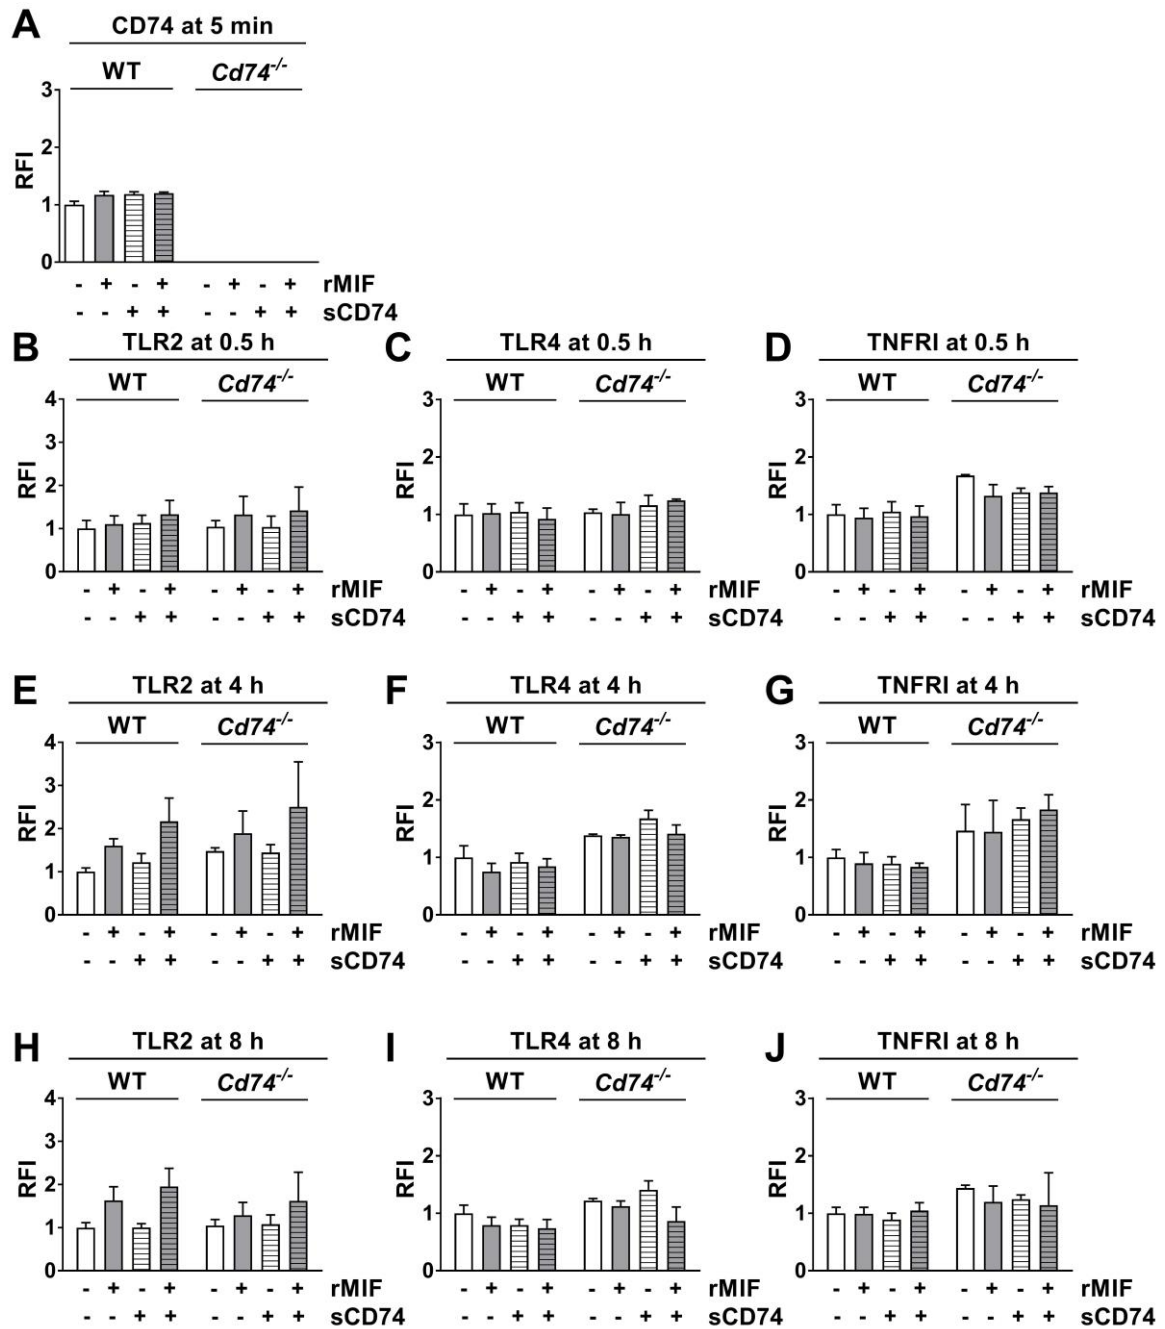

WT and *Cd74*<sup>-/-</sup> myofibroblasts were stimulated with sCD74 either alone or with MIF for **(A)** 5 min **(B-D)** 0.5 h, **(E-G)** 4 h and **(H-J)** 8 h. Subsequently, cells were detached by scraping and cell surface expression of **(A)** CD74, **(B, E, H)** TLR2, **(C, F, I)** TLR4 and **(D, G, J)** TNFRI receptor were analyzed by flow cytometry. The relative fluorescence intensity (RFI) of isotype control was subtracted from MFI of its appropriate antibody preparation. Data represent mean±SEM of at least three independent experiments.
